# Supplementary material for: When the mother-in-law is just as good—Differential mortality of reproductive females by family network composition
Source: PLoS One. 2018 Mar 1;13(3):e0193252. doi: 10.1371/journal.pone.0193252 (PMC5832229; doi:10.1371/journal.pone.0193252)
Supplement: S5 Table — Summary of effects is presented in Table 3 in the Result section. (XLSX) [file pone.0193252.s005.xlsx]

## Sheet: S5 Table
S5 Table. Spatial models estimating the effect of the individual in-law kin
Standard errors in parentheses
** p<0.01, * p<0.05, + p<0.1
Results presented in Table 3 in the manuscript	SPATIAL	SPATIAL	SPATIAL	SPATIAL	SPATIAL	SPATIAL	SPATIAL	SPATIAL	SPATIAL	SPATIAL	SPATIAL	SPATIAL	SPATIAL	SPATIAL	SPATIAL	SPATIAL	SPATIAL	SPATIAL	SPATIAL	SPATIAL	SPATIAL	SPATIAL	SPATIAL	SPATIAL	SPATIAL	SPATIAL	SPATIAL	SPATIAL	SPATIAL	SPATIAL	SPATIAL	SPATIAL	SPATIAL	SPATIAL	SPATIAL	SPATIAL	SPATIAL	SPATIAL	SPATIAL	SPATIAL	SPATIAL	SPATIAL	SPATIAL	SPATIAL	SPATIAL	SPATIAL	SPATIAL	SPATIAL	SPATIAL
	Clustered	Clustered	Clustered	Clustered	Clustered	Clustered	Clustered	Clustered	Clustered	Clustered	Clustered	Clustered	Clustered	Clustered	Clustered	Clustered	Clustered	Clustered	Clustered	Clustered	Clustered	Clustered	Clustered	Clustered	Clustered	Clustered	Clustered	Clustered	Clustered	Clustered	Clustered	Clustered	Clustered	Clustered	Clustered	Clustered	Clustered	Clustered	Clustered	Clustered	Clustered	Clustered	Clustered	Clustered	Clustered	Clustered	Clustered	Clustered	Clustered
	Full Model	Full Model	Full Model	Full Model	Full Model	Full Model	Full Model	Full Model	Full Model	Half Model	Half Model	Half Model	Half Model	Half Model	Half Model	Half Model	Half Model	Half Model	Half Model	Half Model	Half Model	Half Model	Half Model	Half Model	Half Model	Simple Model	Simple Model	Simple Model	Simple Model	Simple Model	Simple Model	Simple Model	Simple Model	Simple Model	Simple Model	Simple Model	Simple Model	Simple Model	Simple Model	Simple Model	Simple Model	Full Model	Full Model	Full Model	Full Model	Full Model	Full Model	Full Model	Full Model
	all cases	all cases	all cases	all cases	all cases	all cases	all cases	all cases	all cases	all cases	all cases	all cases	all cases	all cases	all cases	all cases	all cases	all cases	all cases	all cases	all cases	all cases	all cases	all cases	all cases	all cases	all cases	all cases	all cases	all cases	all cases	all cases	all cases	all cases	all cases	all cases	all cases	all cases	all cases	all cases	all cases	no singlets	no singlets	no singlets	no singlets	no singlets	no singlets	no singlets	no singlets
mother-in-law	0.643**	0.643**	0.638**	0.647**	0.637**	0.649**	0.636**	0.635**	0.637**	0.638**																0.628**																0.690*	0.695*	0.681*	0.697*	0.689*	0.692*	0.682*	0.681*
	(0.079)	(0.078)	(0.078)	(0.079)	(0.077)	(0.079)	(0.078)	(0.078)	(0.078)	(0.071)																(0.070)																(0.111)	(0.112)	(0.110)	(0.113)	(0.110)	(0.112)	(0.110)	(0.110)
father-in-law	1.087	1.087	1.079	1.088	1.071	1.100	1.068	1.068	1.073		0.907																0.886															1.004	0.997	0.999	1.005	0.984	1.009	0.984	0.981
	(0.133)	(0.133)	(0.132)	(0.133)	(0.130)	(0.135)	(0.130)	(0.129)	(0.130)		(0.102)																(0.099)															(0.160)	(0.160)	(0.160)	(0.161)	(0.156)	(0.162)	(0.156)	(0.155)
sisters-in-law	0.970	0.970	0.965	0.971	0.969	0.967	0.968	0.968	0.970			0.897																0.912														1.003	1.003	0.999	1.006	1.004	1.000	1.002	0.999
	(0.067)	(0.067)	(0.067)	(0.067)	(0.067)	(0.067)	(0.067)	(0.068)	(0.067)			(0.060)																(0.060)														(0.088)	(0.087)	(0.087)	(0.088)	(0.088)	(0.088)	(0.088)	(0.087)
brothers-in-law	0.932	0.932	0.931	0.934	0.933	0.932	0.929	0.929	0.932				0.880*																0.870*													0.872	0.877	0.868	0.878	0.878	0.879	0.870	0.866
	(0.061)	(0.061)	(0.061)	(0.061)	(0.062)	(0.062)	(0.062)	(0.062)	(0.062)				(0.055)																(0.054)													(0.076)	(0.077)	(0.076)	(0.077)	(0.077)	(0.077)	(0.076)	(0.076)
sisters of mother-in-law	0.996			1.015	0.998	1.004	0.991	0.991	0.994					0.905																0.901												0.849			0.876	0.849	0.865	0.842	0.832
	(0.167)			(0.169)	(0.168)	(0.167)	(0.166)	(0.167)	(0.166)					(0.152)																(0.152)												(0.188)			(0.200)	(0.189)	(0.192)	(0.188)	(0.189)
male children of sisters of mother-in-law		1.000													0.949																0.966												0.771+
		(0.097)													(0.093)																(0.090)												(0.111)
female children of sisters of mother-in-law			1.141													1.091																1.111												1.037
			(0.097)													(0.095)																(0.096)												(0.114)
brothers of mother-in-law	1.086	1.085	1.060		1.140	1.078	1.090	1.092	1.089								0.986																0.971									1.110	1.136	1.079		1.229	1.100	1.116	1.117
	(0.166)	(0.167)	(0.163)		(0.189)	(0.165)	(0.167)	(0.167)	(0.167)								(0.150)																(0.148)									(0.211)	(0.218)	(0.209)		(0.249)	(0.210)	(0.212)	(0.213)
male children of brothers of mother-in-law				0.997														0.948																0.942											0.921
				(0.094)														(0.091)																(0.090)											(0.117)
female children of brothers of mother-in-law					0.916														0.893																0.882											0.795
					(0.120)														(0.108)																(0.108)											(0.178)
sisters of father-in-law	1.477*	1.477*	1.478*	1.478*	1.434*		1.410+	1.434*	1.447*											1.295																1.279						1.615**	1.586**	1.610**	1.619**	1.567**		1.583*	1.562**
	(0.232)	(0.232)	(0.232)	(0.232)	(0.225)		(0.254)	(0.227)	(0.227)											(0.209)																(0.208)						(0.247)	(0.248)	(0.248)	(0.247)	(0.241)		(0.308)	(0.243)
male children of sisters of father-in-law						1.187*															1.122																1.116										1.187
						(0.095)															(0.093)																(0.091)										(0.128)
female children of sisters of father-in-law							1.025															1.100																1.103										0.991
							(0.115)															(0.118)																(0.118)										(0.130)
brothers of father-in-law	0.767	0.767	0.760	0.766		0.784																	0.732+																0.715+			0.771	0.782	0.764	0.767		0.802
	(0.139)	(0.139)	(0.139)	(0.139)		(0.143)																	(0.132)																(0.128)			(0.177)	(0.179)	(0.177)	(0.176)		(0.185)
male children of brothers of father-in-law								1.016																0.975																0.976									1.063
								(0.095)																(0.091)																(0.091)									(0.131)
female children of brothers of father-in-law									0.944																0.915																0.913
									(0.104)																(0.099)																(0.099)
N male birth	1.153**	1.153**	1.154**	1.154**	1.152**	1.154**	1.153**	1.153**	1.153**	1.153**	1.158**	1.159**	1.158**	1.158**	1.158**	1.159**	1.159**	1.159**	1.158**	1.160**	1.160**	1.161**	1.159**	1.159**	1.159**																	1.142*	1.141*	1.144*	1.142*	1.139*	1.140*	1.141*	1.140*
	(0.054)	(0.054)	(0.054)	(0.054)	(0.054)	(0.054)	(0.054)	(0.054)	(0.054)	(0.054)	(0.054)	(0.054)	(0.054)	(0.054)	(0.054)	(0.054)	(0.054)	(0.054)	(0.054)	(0.054)	(0.054)	(0.054)	(0.054)	(0.054)	(0.054)																	(0.070)	(0.070)	(0.071)	(0.071)	(0.070)	(0.070)	(0.070)	(0.070)
N female birth	1.137*	1.137*	1.137*	1.138*	1.137*	1.135*	1.138*	1.138*	1.137*	1.135*	1.137*	1.136*	1.141*	1.137*	1.139*	1.137*	1.137*	1.137*	1.137*	1.138*	1.136*	1.136*	1.136*	1.137*	1.136*																	1.036	1.045	1.034	1.036	1.038	1.031	1.037	1.038
	(0.061)	(0.062)	(0.061)	(0.061)	(0.061)	(0.061)	(0.061)	(0.061)	(0.061)	(0.061)	(0.061)	(0.061)	(0.061)	(0.061)	(0.061)	(0.061)	(0.061)	(0.061)	(0.061)	(0.061)	(0.061)	(0.061)	(0.061)	(0.061)	(0.061)																	(0.076)	(0.077)	(0.076)	(0.076)	(0.076)	(0.076)	(0.076)	(0.076)
sons	0.837**	0.837**	0.837**	0.836**	0.837**	0.836**	0.837**	0.837**	0.837**	0.836**	0.832**	0.832**	0.832**	0.832**	0.832**	0.832**	0.832**	0.832**	0.833**	0.832**	0.832**	0.831**	0.831**	0.832**	0.832**																	0.863*	0.864*	0.863*	0.863*	0.866*	0.863*	0.863*	0.864*
	(0.046)	(0.046)	(0.046)	(0.046)	(0.046)	(0.046)	(0.046)	(0.046)	(0.046)	(0.046)	(0.046)	(0.046)	(0.046)	(0.046)	(0.046)	(0.046)	(0.046)	(0.046)	(0.046)	(0.046)	(0.046)	(0.046)	(0.046)	(0.046)	(0.046)																	(0.063)	(0.063)	(0.063)	(0.063)	(0.063)	(0.063)	(0.063)	(0.063)
daughters	0.822**	0.822**	0.823**	0.822**	0.823**	0.823**	0.822**	0.822**	0.823**	0.823**	0.821**	0.822**	0.819**	0.822**	0.821**	0.822**	0.822**	0.822**	0.823**	0.822**	0.823**	0.823**	0.822**	0.822**	0.822**																	0.894	0.887	0.895	0.894	0.893	0.898	0.893	0.892
	(0.052)	(0.052)	(0.052)	(0.052)	(0.052)	(0.052)	(0.052)	(0.052)	(0.052)	(0.052)	(0.052)	(0.052)	(0.052)	(0.052)	(0.052)	(0.052)	(0.052)	(0.052)	(0.052)	(0.052)	(0.052)	(0.052)	(0.052)	(0.052)	(0.052)																	(0.076)	(0.076)	(0.076)	(0.076)	(0.076)	(0.077)	(0.076)	(0.076)
postpartum period	7.706**	7.706**	7.706**	7.705**	7.701**	7.706**	7.703**	7.702**	7.702**	7.710**	7.663**	7.656**	7.660**	7.651**	7.654**	7.651**	7.652**	7.651**	7.652**	7.647**	7.650**	7.654**	7.661**	7.653**	7.653**																	8.081**	8.086**	8.085**	8.085**	8.079**	8.078**	8.079**	8.081**
	(0.689)	(0.689)	(0.689)	(0.689)	(0.689)	(0.689)	(0.689)	(0.689)	(0.689)	(0.690)	(0.684)	(0.684)	(0.684)	(0.683)	(0.683)	(0.683)	(0.683)	(0.683)	(0.683)	(0.683)	(0.683)	(0.683)	(0.684)	(0.683)	(0.683)																	(0.928)	(0.928)	(0.928)	(0.928)	(0.927)	(0.928)	(0.927)	(0.928)
birth cohort	0.962**	0.962**	0.963**	0.962**	0.961**	0.961**	0.961**	0.961**	0.961**	0.962**	0.960**	0.958**	0.960**	0.959**	0.959**	0.960**	0.959**	0.959**	0.959**	0.959**	0.959**	0.959**	0.960**	0.959**	0.959**																	0.956*	0.955**	0.957*	0.956*	0.955**	0.956*	0.955*	0.956*
	(0.013)	(0.013)	(0.013)	(0.013)	(0.013)	(0.013)	(0.013)	(0.013)	(0.013)	(0.013)	(0.013)	(0.013)	(0.013)	(0.013)	(0.013)	(0.013)	(0.013)	(0.013)	(0.013)	(0.013)	(0.013)	(0.013)	(0.013)	(0.013)	(0.013)																	(0.017)	(0.017)	(0.017)	(0.017)	(0.017)	(0.017)	(0.017)	(0.017)
husband alive	1.000	1.000	1.000	1.000	1.000	1.000	1.000	1.000	1.000	1.000	1.000	1.000	1.000	1.000	1.000	1.000	1.000	1.000	1.000	1.000	1.000	1.000	1.000	1.000	1.000																	1.000	1.000	1.000	1.000	1.000	1.000	1.000	1.000
	(0.000)	(0.000)	(0.000)	(0.000)	(0.000)	(0.000)	(0.000)	(0.000)	(0.000)	(0.000)	(0.000)	(0.000)	(0.000)	(0.000)	(0.000)	(0.000)	(0.000)	(0.000)	(0.000)	(0.000)	(0.000)	(0.000)	(0.000)	(0.000)	(0.000)																	(0.000)	(0.000)	(0.000)	(0.000)	(0.000)	(0.000)	(0.000)	(0.000)
birth rank (1=first born)	1.008	1.008	1.008	1.008	1.008	1.008	1.008	1.008	1.008	1.008	1.008	1.009	1.008	1.008	1.008	1.008	1.008	1.008	1.008	1.009	1.009	1.008	1.009	1.008	1.008																	1.031	1.029	1.031+	1.031+	1.029	1.030	1.030	1.030
	(0.015)	(0.016)	(0.015)	(0.015)	(0.016)	(0.015)	(0.015)	(0.015)	(0.015)	(0.015)	(0.016)	(0.015)	(0.015)	(0.016)	(0.016)	(0.016)	(0.016)	(0.016)	(0.016)	(0.016)	(0.016)	(0.016)	(0.016)	(0.016)	(0.016)																	(0.019)	(0.019)	(0.019)	(0.019)	(0.019)	(0.019)	(0.019)	(0.019)
SES (Ref. large-scale farmer)
mid-scale farmers	1.282	1.283	1.284	1.280	1.279	1.290	1.284	1.282	1.282	1.281	1.272	1.263	1.267	1.267	1.266	1.269	1.268	1.265	1.263	1.272	1.277	1.274	1.268	1.270	1.267																	1.390	1.381	1.388	1.378	1.386	1.399	1.389	1.389
	(0.263)	(0.263)	(0.264)	(0.263)	(0.263)	(0.264)	(0.263)	(0.263)	(0.263)	(0.263)	(0.262)	(0.260)	(0.261)	(0.261)	(0.260)	(0.262)	(0.261)	(0.260)	(0.260)	(0.262)	(0.262)	(0.262)	(0.261)	(0.261)	(0.261)																	(0.390)	(0.386)	(0.391)	(0.388)	(0.389)	(0.390)	(0.390)	(0.390)
small-scale farmers	1.235	1.234	1.228	1.236	1.230	1.241	1.232	1.231	1.233	1.233	1.217	1.215	1.209	1.213	1.211	1.206	1.210	1.207	1.209	1.213	1.219	1.213	1.213	1.210	1.211																	1.819*	1.818*	1.799*	1.812*	1.798*	1.836*	1.811*	1.811*
	(0.265)	(0.265)	(0.263)	(0.265)	(0.264)	(0.265)	(0.264)	(0.264)	(0.264)	(0.264)	(0.261)	(0.261)	(0.259)	(0.261)	(0.260)	(0.259)	(0.260)	(0.259)	(0.259)	(0.260)	(0.261)	(0.260)	(0.260)	(0.260)	(0.260)																	(0.504)	(0.504)	(0.500)	(0.504)	(0.498)	(0.504)	(0.501)	(0.502)
landless	1.054	1.054	1.063	1.054	1.048	1.061	1.051	1.050	1.051	1.045	1.016	1.017	1.021	1.007	1.005	1.012	1.008	1.006	1.006	1.008	1.014	1.010	1.014	1.009	1.009																	1.188	1.181	1.190	1.184	1.176	1.199	1.180	1.178
	(0.173)	(0.173)	(0.174)	(0.173)	(0.172)	(0.173)	(0.172)	(0.173)	(0.173)	(0.172)	(0.167)	(0.168)	(0.168)	(0.166)	(0.165)	(0.166)	(0.166)	(0.166)	(0.166)	(0.166)	(0.166)	(0.166)	(0.167)	(0.166)	(0.166)																	(0.273)	(0.270)	(0.273)	(0.272)	(0.269)	(0.272)	(0.271)	(0.270)
unknown	1.445*	1.445*	1.456*	1.446*	1.439*	1.457*	1.443*	1.442*	1.444*	1.440*	1.407*	1.416*	1.408*	1.400*	1.398*	1.406*	1.401*	1.398*	1.398*	1.400*	1.408*	1.400*	1.407*	1.403*	1.403*																	1.711*	1.706*	1.709*	1.704*	1.697*	1.729*	1.704*	1.701*
	(0.240)	(0.240)	(0.241)	(0.240)	(0.239)	(0.241)	(0.240)	(0.240)	(0.240)	(0.240)	(0.235)	(0.237)	(0.235)	(0.233)	(0.233)	(0.234)	(0.234)	(0.233)	(0.233)	(0.233)	(0.234)	(0.233)	(0.234)	(0.234)	(0.234)																	(0.394)	(0.391)	(0.394)	(0.393)	(0.390)	(0.395)	(0.392)	(0.392)
N women	4.914	4.914	4.914	4.914	4.914	4.914	4.914	4.914	4.914	4.914	4.914	4.914	4.914	4.914	4.914	4.914	4.914	4.914	4.914	4.914	4.914	4.914	4.914	4.914	4.914	4.914	4.914	4.914	4.914	4.914	4.914	4.914	4.914	4.914	4.914	4.914	4.914	4.914	4.914	4.914	4.914	2.908	2.908	2.908	2.908	2.908	2.908	2.908	2.908
Dead	833	833	833	833	833	833	833	833	833	833	833	833	833	833	833	833	833	833	833	833	833	833	833	833	833	833	833	833	833	833	833	833	833	833	833	833	833	833	833	833	833	494	494	494	494	494	494	494	494
N families (cluster and strata, respectively)	3.201	3.201	3.201	3.201	3.201	3.201	3.201	3.201	3.201	3.201	3.201	3.201	3.201	3.201	3.201	3.201	3.201	3.201	3.201	3.201	3.201	3.201	3.201	3.201	3.201	3.201	3.201	3.201	3.201	3.201	3.201	3.201	3.201	3.201	3.201	3.201	3.201	3.201	3.201	3.201	3.201	1.195	1.195	1.195	1.195	1.195	1.195	1.195	1.195
Observations	167,699	167,699	167,699	167,699	167,699	167,699	167,699	167,699	167,699	167,699	167,699	167,699	167,699	167,699	167,699	167,699	167,699	167,699	167,699	167,699	167,699	167,699	167,699	167,699	167,699	167,699	167,699	167,699	167,699	167,699	167,699	167,699	167,699	167,699	167,699	167,699	167,699	167,699	167,699	167,699	167,699	106,980	106,980	106,980	106,980	106,980	106,980	106,980	106,980
Robust standard errors in parentheses
[truncated: 74 more columns]
